# Supplementary material
Source: MDPI journal article supplement (https://www.mdpi.com/2073-4395/12/10/2510)
Supplement: s1 [file s1]

**Table S1.** Physiological and biochemical characteristics of isolates KAU2022.

| Characteristic                      | Results  |
|-------------------------------------|----------|
| spore-forming,                      | +        |
| rod-shaped bacterium                | +        |
| Gram-positive                       | +        |
| motile                              | +        |
| Growth temperature (°C):            |          |
| Range                               | 20–55    |
| Optimum                             | 35–40    |
| Nitrate reduction                   | +        |
| Hydrolysis of:                      |          |
| Casein                              | –        |
| Gelatin                             | +        |
| catalase                            | positive |
| Starch                              | –        |
| indole                              | negative |
| Utilization of sole carbon sources: |          |
| L-Alanine                           | +        |
| D-Gluconate                         | +        |
| 2-Ketogluconate                     | +        |
| DL-Lactate                          | –        |
| Maltose                             | +        |
| D-Mannitol                          | +        |
| <i>N</i> -Acetyl-D-glucosamine      | +        |
| Phenylacetate                       | +        |
| Sucrose                             | +        |
| Citrate                             | +        |
| glucose                             | +        |
| xylose                              | –        |
| arabinose                           | –        |
| fructose                            | –        |
| Cellobiose                          | +        |

+, Positive; –, negative; v, variable.

**Table S2.** Morphological and physiological characteristics of the selected isolate KAU2025.

| Characteristic                         | Results |
|----------------------------------------|---------|
| spore-forming,                         | –       |
| rod-shaped bacterium                   | +       |
| Gram-positive                          | –       |
| motile                                 | +       |
| <b>Hydrolysis of:</b>                  |         |
| Casein                                 | –       |
| Gelatin                                | +       |
| catalase                               | +       |
| Starch                                 | –       |
| Lipases                                | +       |
| Amylases                               | +       |
| Cellulases                             | +       |
| Proteases                              | –       |
| Chitinase                              | +       |
| Citrate                                | +       |
| V.P.                                   | +       |
| M.R.                                   |         |
| <b>Carbohydrate fermentation tests</b> |         |
| Mannose Negative                       | –       |
| Xylose Negative                        | –       |
| Mannitol Negative                      | –       |
| Raffinose Negative                     | –       |
| Rhamnose Negative                      | –       |
| Inositol Negative                      | –       |
| Galactose Positive                     | +       |
| Fructose Positive                      | +       |
| D-glucose Positive                     | +       |
| Glucose                                | +       |

+, Positive; –, negative.
